## The cytokine, chemokine, and growth factor network of prenatal depression

(1-5) Michael Maes, (6,7) Yoshiko Abe, (6,8) Wandee Sirichokchatchawan, (9) Junpen Suwimonteerabutr, (10) Ussanee Sangkomkamhangd, (1,11) Abbas F. Almulla, (12) Sirina Satthapisit

(1) Department of Psychiatry, Faculty of Medicine, Chulalongkorn University and King Chulalongkorn Memorial Hospital, the Thai Red Cross Society, Bangkok, Thailand

(2) Kyung Hee University, 26 Kyungheedaero, Dongdaemun-gu, Seoul 02447, Korea

(3) Department of Psychiatry, Medical University of Plovdiv, Plovdiv, Bulgaria

(4) Research Institute, Medical University of Plovdiv, Plovdiv, Bulgaria

(5) IMPACT Strategic Research Center, Barwon Health, Geelong, Australia

(6) College of Public Health Sciences (CPHS), Chulalongkorn University, Bangkok 10330, Thailand

(7) Department of Public Health, Dokkyo Medical University School of Medicine, Tochigi 321-0293, Japan

(8) Health and Social Sciences and Addiction Research Unit, Chulalongkorn University, Bangkok, Thailand

(9) Department of Obstetrics, Gynaecology and Reproduction, Faculty of Veterinary Science, Chulalongkorn University, Bangkok 10330, Thailand

(10) Department of Obstetrics and Gynecology, Khon Kaen Hospital, Khon Kaen 40000, Thailand

(11) Medical Laboratory Technology Department, College of Medical Technology, The Islamic University, Najaf, Iraq.

(12) Department of Psychiatry, Khon Kaen Hospital, Khon Kaen 40000, Thailand

**NOTE: This preprint reports new research that has not been certified by peer review and should not be used to guide clinical practice.**

**Corresponding author:**

Prof. Dr. Michael Maes, M.D., Ph.D.

Department of Psychiatry,

Faculty of Medicine,

King Chulalongkorn Memorial University

Bangkok, 10330 Thailand

email: [Dr.michaelmaes@hotmail.com](mailto:Dr.michaelmaes@hotmail.com)

[Michael Maes - Google Scholar](#)

Email addresses:

[dr.michaelmaes@hotmail.com](mailto:dr.michaelmaes@hotmail.com)

[walk1212yoshiko@gmail.com](mailto:walk1212yoshiko@gmail.com)

[wandee.s@chula.ac.th](mailto:wandee.s@chula.ac.th)

[Junpen.S@chula.ac.th](mailto:Junpen.S@chula.ac.th)

[swadpanich@hotmail.com](mailto:swadpanich@hotmail.com)

[abbass.chem.almulla1991@gmail.com](mailto:abbass.chem.almulla1991@gmail.com)

[s.satthapisit@gmail.com](mailto:s.satthapisit@gmail.com)

## Abstract

**Background:** Neuro-immune pathways are engaged in antenatal and postpartum depression.

**Aims:** To determine if immune profiles influence the severity of prenatal depression above and beyond the effects of adverse childhood experiences (ACE), premenstrual syndrome (PMS) and current psychological stressors.

**Methods:** Using the Bio-Plex Pro human cytokine 27-plex test kit, we assayed M1 macrophage, T helper (Th)-1, Th-2, Th-17, growth factor, chemokine, T cell growth immune profiles as well as indicators of the immune inflammatory response system (IRS) and compensatory immunoregulatory system (CIRS) in 120 pregnant females in the early (<16 weeks) and late (> 24 weeks) pregnancy. The Edinburgh Postnatal Depression Scale (EPDS) was used to assess severity of antenatal depression.

**Results:** Cluster analyses showed that the combined effects of ACE, relationship dissatisfaction, unwanted pregnancy, PMS, and upregulated M1, Th-1, Th-2 and IRS immune profiles and the ensuing early depressive symptoms shape a stress-immune-depression phenotypic class. Elevated IL-4, IL-6, IL-8, IL-12p70, IL-15, IL-17 and GM-CSF are the primary cytokines associated with this new phenotypic class. All immune profiles (except CIRS) were significantly associated with the early EPDS score, independent of the effects of psychological variables and PMS. There was a shift in immune profiles from early to late pregnancy, with an increase in the IRS/CIRS ratio. The late EPDS score was predicted by the early EPDS score, adverse experiences, and immune profiles, mainly the Th-2 and Th-17 phenotypes.

**Conclusions:** Activated immune phenotypes contribute to early and late perinatal depressive symptoms above and beyond the effects of psychological stressors and PMS.

Key words: major depression, neuro-immune, inflammation, cytokines, affective disorders, psychiatry

## Introduction

Antenatal depression (AD) is a worldwide public health problem with negative effects on mother and child [1]. Antenatal depression increases the risk of postnatal depression, low birth weight, operative delivery, preterm birth, preeclampsia, mother and familial distress, suicide risk, and also impacts neurocognitive development and behaviors in the children [1-7].

Psychological stressors, such as relationship unhappiness, unwanted pregnancy, partner abuse, adverse childhood experiences (ACE), and lowered social support greatly predict the severity of antenatal depression [7]. Previous meta-analysis and reviews reported that ACE, such as physical, emotional, and sexual abuse, physical and emotional neglect, and family dysfunctions, substantially enhance the likelihood of antenatal depression [7-11]. Recently, it was established that less social support from friends partially mediates the impact of childhood neglect on prenatal depression severity [7]. In fact, ACE (especially psychological and physical abuse and neglect), emotional or physical abuse by the spouse, unexpected pregnancy, and dissatisfaction with the intimate spouse relationship, predicted a larger part of the variance in severity of antenatal depression as assessed with the Edinburgh Postnatal Depression Scale (EPDS) score [7].

In addition, the severity of premenstrual syndrome (PMS), as measured by the Premenstrual Symptoms Screening Test (PSST), was a substantial predictor of the severity of antenatal depression [12]. PMS or better Menstrual Cycle – Associated Syndrome (MCAS, which offers better diagnostic criteria than PMS) [13,14] is characterised by increased levels of affective symptoms, including depressed mood, tearfulness, mood swings, irritability, and tension, and physiosomatic symptoms, including food cravings, headache, abdominal bloating and breast pain [13,14]. In women with MCAS/PMS, these symptoms are elevated throughout the menstrual cycle, but deteriorate 6 days and reach a peak 2 days before menstruation begins [13-16]. In fact, the regression on PSST scores (affective, physiosomatic and inference with

daily functioning) coupled with partner abuse and ACE explained a larger part of the variance in the EPDS score, when assessed in early pregnancy phase (< 16 gestational weeks) [7]. The latter study reported that the EPDS score assessed after gestational week 24 was strongly associated with the affective component of the PSST [7].

Neuro-immune and neuro-oxidative stress pathways are engaged in antenatal and postpartum depression [1,17,18]. Prenatal depression is associated with exaggerated pregnancy-specific changes in these pathways, including decreased levels of zinc and increased C-reactive protein, indicating a mild inflammatory response, and increased indices of protein oxidation and nitric oxide metabolites, indicating increased nitro-oxidative stress [1,18]. Elevated levels of IL-1 $\beta$  and IL-6 are related with the severity of depression throughout the prenatal and postnatal periods [19]. Major depressive disorder (MDD) in non-pregnant people is characterised by activated M1 macrophage, T helper (Th)-1, Th-2, Th-17, T cell proliferation, chemokine and growth factor profiles, as well as the immune-inflammatory responses system (IRS) and the compensatory immunoregulatory system (CIRS) [20-22].

Moreover, the same neuro-immune and neuro-oxidative pathways are implicated in the pathophysiology of MCAS/PMS, menstruation distress and ACE [21,23,24,25]. Increased levels of neurotoxic chemokines such as CCL2, CCL11, CCL5, and CXCL10 predict affective and physiosomatic symptoms during the menstrual cycle, whereas menstruation-related physiosomatic (pain, cramps, gastro-intestinal) symptoms are associated with CCL5 and inflammatory markers [23,24]. Crucially, ACE stimulate the networks of cytokines and growth factors linked with MDD [21].

Nevertheless, no research has evaluated whether prenatal depression is associated by abnormalities in the M1, Th-1, Th-2, Th-17, T cell proliferation, chemokine, IRS, and CIRS profiles, above and beyond the effects of PMS and adverse experiences. In order to determine if these immune profiles influence the severity of prenatal depression beyond the effects of

ACE and PMS, the present investigation was conducted. The specific hypothesis is that immune profiles, and especially the M1, Th-1, Th-17 and IRS profiles, are associated with antenatal depression, because these three profiles are strongly associated with non-pregnancy-associated MDD [20].

## 2. Methods

### Participants

This research included 120 pregnant women at the Antenatal Care (ANC) Center at Khon Kaen Hospital, a provincial hospital located in Khon Kaen, Thailand. Khon Kaen is a province in Thailand's northeast. Using predetermined inclusion and exclusion criteria, a professional researcher selected the pregnant participants. Pregnant women between the ages of 18 and 49 who resided in the province of Khon Kaen and were able to read and write Thai were eligible. In addition, their pregnancy had not yet reached 16 weeks gestation, and they wanted to get ANC treatment in the hospital until giving birth. Our study is a prospective cohort study whereby we examined two repeated measurements of depression scores and immune data from the early (gestational week < 16) to late (gestational week > 24) prenatal phase. After the first early phase assessment, twenty-four women withdrew, choosing for follow-up at alternate facilities. As such, 96 of the 120 women who participated in the early prenatal phase had assessments of depression and immune profiles during the late pregnancy phase. Pregnant women with axis-I mental disorders other than depression were excluded from the study, such as bipolar disorder, schizophrenia, autism, substance abuse disorders, psycho-organic disorders, and generalized anxiety disorder. We also excluded women with immune, autoimmune, and neuroinflammatory disorders, including inflammatory bowel disease, multiple sclerosis, type 1 diabetes mellitus, systemic lupus erythematosus, rheumatoid arthritis,

and psoriasis, as well as women who were taking antidepressants, mood stabilizers, antipsychotic drugs or immunosuppressive drugs.

Institutional Review Board (IRB) permission was received from both Khon Kaen Hospital and Chulalongkorn University (KEF62036 and COA No.280/2019). All women provided their informed consent in writing.

## Measurements

The sociodemographic data included age, marital status, family income, and the age of the spouse. The women's medical records were examined for their gravidity, parity, pregnancies, body mass index (BMI), and perinatal depression history. The Edinburgh Postnatal Depression Scale (EPDS) was used to evaluate depressed symptoms and the degree of depression [26]. The scale consists of 10 items scored from 0 to 3 on a four-point Likert scale, with a total score ranging from 0 to 30. This scale measures the emotional state of pregnant women throughout the previous week. In the Thai version of the EPDS, the validated screening cutoff value for pregnant women was  $\geq 10$  (AUC 0.84, sensitivity 60%, and specificity 90%) [27]. This scale has strong reliability and validity, as indicated by a research done in the upper Northeast area of Thailand among pregnant women in their third trimester [28]. Relationship satisfaction was evaluated using a four-point Likert scale ranging from "satisfied" to "dissatisfied." In addition, we evaluated if the pregnancy was unintended (dummy variable: yes/no). The Abuse Assessment Screen for intimate partner violence (AAS) [29,30] was used to assess partner abuse during pregnancy among our pregnant women. We used item 1 (AAS1) in the current study since it was the most important in a previous study [7]. The Multidimensional Scale of Perceived Social Support (MSPSS) [31], a 12-item rating measure scored on a seven-point Likert scale (1 to 7 for each item), was used to assess perceived social support [31]. The MSPSS friends subdomain was chosen as the most important domain for this



study [7]. The Adverse Childhood Experiences (ACE) Questionnaire was used to evaluate adverse childhood experiences [32]. In the current study, we used [7] psychological abuse, physical abuse, sexual abuse, a formative construct made using the three abuse scores (labeled ACE\_abuse), any neglect (mental or physical neglect), and a PC extracted from psychological and physical abuse, domestic violence, a family history of substance abuse, and a family history of psychiatric illness (labeled ACE\_FDA, ACE-Family-Dysfunction & Abuse [7]).

To measure PMS symptoms, the Premenstrual Symptoms Screening Test (PSST) was used. The premenstrual symptoms (items 1-14) and their repercussions in different contexts (A-E: 5 items) were assessed on a four-point Likert scale ranging from "not at all" to "mild" to "moderate" to "severe" and scored on a scale from 1 to 4 [33]. In the current study, we used the first PC extracted from 10 PSST reflecting the affective component of PMS (labelled PSST\_depression); the first PC extracted from 3 physiosomatic PSST symptoms (labelled PSST\_physiosom); and the first PC extracted from all five PSS interference data (A, B, C, D, and E) (labelled PSST\_inference) and the total PSST score.

## Assays.

BD Vacutainer® EDTA (10 mL) tubes were used to collect fasting blood in the early morning hours. Blood was sampled from 120 women in the early pregnancy phase (< 16 gestational weeks) and in 96 of those women in the late pregnancy phase (> 24 gestational weeks). We determined the concentrations of cytokines, chemokines, and growth factors in plasma samples using the Bio-Plex Pro human cytokine 27-plex test kit (BioRad, Carlsbad, California, United States of America). The LUMINEX 200 apparatus was used to measure the fluorescence intensities (FI) of the detecting antibodies and streptavidin-PE (BioRad, Carlsbad, California, United States of America). The intra-assay coefficient of variance of all analytes were less than 11 percent. **Electronic Supplementary File (ESF), Table 1** lists the names,

acronyms, and official gene symbols for all the cytokines/chemokines/growth factors measured in this study. In the current investigation, we chose to perform statistical analyses on the FI data (with the blank analyte removed) since FI values are often a superior alternative to absolute concentrations, particularly when more than one plate is used [22,23]. IL-1 $\beta$ , IL-2, IL-5, IL-7, IL-10, IFN- $\gamma$ , CCL5, and VEGF exhibited a high number of results below the assay's sensitivity (>60%) and, therefore, were excluded from the analysis performed on the single indicators. Nevertheless, these analytes (except IL-5) were used to compute the composite scores when at least 7% (n=15) of the assays were measurable. As such, 8 analytes were excluded from the single indicator analyses, but IL-1 $\beta$ , IL-2, IL-7, IL-10, IFN- $\gamma$ , CCL5, and VEGF could be used as prevalences in the computation of composite scores. **ESF, Table 2** provides a summary of the immunological profiles studied in this investigation [22,23]. Where needed, cytokines were used after logarithmic (log10), square root, or fractional rank-based normal transformations, Winsorization, and all data were processed as z transformations.

## Data analysis

We used analysis of variance (ANOVA) to compare scale variables across research groups and Chi-square ( $\chi^2$ ) or Fisher's exact probability test to compare categories. Using Pearson's product-moment correlation coefficients and the point-biserial correlation coefficient, correlations between scale variables or scale and binary variables were analyzed. Using Generalized Linear Model (GLM) analysis, the connection between the EPDS score and immune profiles was investigated. An automatic stepwise binary logistic regression analysis was performed to determine the most accurate predictors of prenatal depression versus the absence of antenatal depression using the immune profiles, PSST and ACE scores, relationship satisfaction, planned versus unplanned pregnancy, AAS1 and the MSPSS\_friends score. Using multiple regression analysis, the most influential factors (immune and psychological variables

and PMS) affecting the EPDS score were determined. In addition to the manual regression technique, we used an automated technique with p-values of 0.05 for model entrance and 0.10 for model exclusion. We determined the model statistics (F, df, and p values) and the total variance explained ( $R^2$ ), as well as the standardized  $\beta$  coefficients with t statistics and p-values for each predictor. Also, the variance inflation factor and tolerance were evaluated to identify any collinearity or multicollinearity concerns. Heteroskedasticity was determined with the use of the White and modified Breusch-Pagan homoscedasticity tests. Generalized estimating equations (GEE), repeated measures, were employed to examine the associations between the repeated assessments of the EPDS and biomarker data. For statistical significance, two-tailed tests with a p-value of 0.05 were utilized. The various immune profiles were investigated using principal component analysis (PCA) to check whether one general immune PC could be extracted. The KMO statistic (cut-off value > 0.6), Bartlett's test and the anti-image correlation matrix were used to evaluate the data's factoriability. To be accepted as a valid PC, the variance explained should be > 50.0% and all loadings should be > 0.7 on this first PC. We used two-step cluster analysis to delineate a cluster of patients with increased EPDS scores and immune profiles, both entered as continuous variables and the antenatal depression diagnosis entered as a categorical variable. The number of clusters was determined automatically, and the cluster solution was evaluated using the silhouette measure of cohesion and separation (threshold value > 0.5). All statistical analyses were conducted using version 28 of IBM, SPSS for Windows.

## Results.

### *Results of cluster analyses performed on the early phase data*

We found that the early phase EPDS score was strongly associated with the total PSST score ( $r=0.688$ ,  $p<0.001$ ,  $n=120$ ), relation dissatisfaction ( $r=0.406$ ,  $p<0.001$ ), unplanned

pregnancy ( $r=0.413$ ,  $p<0.001$ ), and AAS1 ( $r=0.403$ ,  $p<0.001$ ). A large part (31.0%;  $F=13.34$ ,  $df=3/111$ ,  $p<0.001$ ) of the variance in the total EPDS score was explained by the combined effects of unplanned pregnancy ( $p<0.001$ ), relation dissatisfaction ( $p=0.017$ ) and AAS1 ( $p<0.001$ ). Since these psychological factors explain such a large part of the variance, we also computed residualized EPDS (resEPDS) values after covarying for relation dissatisfaction, unplanned pregnancy and AAS1. This new EPDS score thus reflects severity of depression independent of the effects of negative psychological stressors.

A two-step cluster analysis was performed with the diagnosis of antenatal depression ( $EDPS \geq 10$ ) as categorical factor, total EPDS and resEPDS scores, and the three major cytokine profiles (M1, Th-1 and Th-17) as continuous variables. A two-cluster solution yielded the best solution with a silhouette measure of cohesion and separation of 0.68: the first cluster comprised 76 people, and the second cluster with 44 people. **Figure 1** shows that both EPDS scores and all immune profiles, except CIRS, were significantly higher in cluster 2 than in cluster 1. **ESF, Table 3** shows the results of univariate GLM analyses of the immune profiles with age and BMI as covariates. The top 3 most important profiles of cluster 2 were (in descending order): Th-1, IRS, and T cell growth. **ESF, Table 4** shows the outcome of univariate GLM analyses performed on the single cytokines-growth factors; IL4, IL-6, IL-8, IL-12<sub>p70</sub>, IL-15, IL-17 and GM-CSF were significantly higher in cluster 2 than cluster 1. **ESF, Figure 1** shows a clustered bar graph with the differences in those cytokines.

#### *Socio-demographic and clinical data*

**Table 1** shows the socio-demographic and clinical data in both clusters. There were no significant differences in age, pre-pregnancy BMI, gravidity, parity, and a history of Caesarian delivery between both clusters. Unplanned pregnancy, relation dissatisfaction, and AAS1 were all significantly higher in cluster 2 than in cluster 1. PSST\_depression, PSST\_physiosom,

PSST\_interference and PSST\_total were significantly higher in cluster 2 than in cluster 1, whilst MSPSS\_friends was significantly lower in cluster 2. Psychological abuse, physical abuse, total abuse, ACE1, domestic violence and family dysfunction were significantly higher in cluster 2 than in cluster 1. Binary logistic regression analysis showed that PSST\_interference (Wald=6.02, df=1, p=0.014), PSST\_depression (Wald=5.30, p=0.005), and All\_abuse (Wald=9.17, p=0.002) predict cluster 2 versus cluster 1 ( $\chi^2=43.57$ , df=3, p<0.001) with a Nagelkerke value of 0.416. The total number of correctly classified patients was 84.2% (sensitivity=77.3% and specificity=88.2%). As such the cluster analysis performed on the early pregnancy data has generated a cluster of pregnant women with increased adverse experiences, immune and depression scores.

#### *Prediction of the early EPDS scores using immune profiles*

Multiple regression analysis showed that 67.5% of the variance in the early phase EPDS score ( $F=36.50$ , df=5/88, p<0.001) was explained by the regression on PSST\_total ( $\beta=0.496$ ,  $t=7.58$ , p<0.001), ACE1 ( $\beta=0.221$ ,  $t=3.43$  p<0.001), MSPSS\_friends ( $\beta= -0.257$ ,  $t=-4.06$ , p<0.001), relationship dissatisfaction ( $\beta= 0.182$ ,  $t=2.80$ , p=0.006) and AAS1 ( $\beta= 0.171$ ,  $t=2.62$ , p=0.010). **Table 2** shows that the early phase M1, Th-1, Th-2, Th-17, IRS, and growth factor profiles, and the IRS/CIRS ratio had significant effects on the early phase EPDS score above and beyond the effects of those PMS, social support and psychological scores (entered as 5 covariates, forced entry). **Figures 2 and 3** show the partial regressions of the baseline EPDS score on the early phase Th-1 and Th-17 profiles, respectively. Of the 7 single cytokines that were increased in cluster 2, we found that CXCL8 (IL-8), IL-15, IL-17 and GM-CSF were significantly associated with the early EPDS score.

#### *EPDS and immune profiles in the late pregnancy phase*

We examined whether the late phase EPDS score could be explained by independent effects of immune profiles. A first multiple regression analysis ( $F=12.14$ ,  $df=4/86$ ,  $p<0.001$ ) showed that 36.1% of the variance in the late phase EPDS score was explained by the early phase EPDS score ( $\beta=303$ ,  $t=3.36$ ,  $p=0.001$ ), mental neglect ( $\beta=0.261$ ,  $t=2.96$ ,  $p=0.004$ ), AAS1 ( $\beta=0.253$ ,  $t=2.85$ ,  $p=0.005$ ) and late phase Th-2 ( $\beta=0.234$ ,  $t=2.71$ ,  $p=0.008$ ). In addition, the late phase Th-17 ( $\beta=0.189$ ,  $t=2.15$ ,  $p=0.035$ ) and CIRS ( $\beta=0.235$ ,  $t=2.68$ ,  $p=0.009$ ) profiles had significant effects on late phase EPDS, above and beyond the effects of the early EPDS score (which is affected by immune profiles), mental neglect, and AAS1.

**ESF, Table 5** shows the results of GEE (repeated measurements) analyses with the early and late EPDS and immune profiles as dependent variables and time (early-late pregnancy phase), the early pregnancy clusters and their interaction as explanatory variables. There was a significant effect of the interaction pattern time x diagnosis (and significant time and diagnosis effects) on the repeated EPDS assessments. We found a significant increase in cluster 1 people ( $p=0.010$ ), but in cluster 2 there was a significant decrease in the EPDS score from the early to the late phase ( $p<0.001$ ). The same table shows the increased late EPDS values in cluster 1 are accompanied by increased Th-1, Th-17, IRS, growth factor and T cell growth profiles. The lowered late EPDS scores in cluster 2 are accompanied by lowered Th-1, and Th-2 profiles.

Using GEE analyses (repeated measurements) we found that the EPDS scores (the early to the late phase) were significantly and positively associated with the Th-1 (Wald=4.73,  $df=1$ ,  $p=0.030$ ), Th-2 (Wald=4.02,  $df=1$ ,  $p=0.045$ ), Th-17 (Wald=7.32,  $df=1$ ,  $p=0.007$ ), IRS (Wald=4.71,  $df=1$ ,  $p=0.030$ ), and CIRS (Wald=5.55,  $df=1$ ,  $p=0.018$ ) profiles. Of the 7 cytokines that were increased in cluster 2, we found that the repeated measurements of IL-4 (Wald=5.50,  $df=1$ ,  $p=0.019$ ), IL-6 (Wald=4.21,  $df=1$ ,  $p=0.040$ ), IL-15 (Wald=4.20,  $df=1$ ,  $p=0.040$ ), and IL-17 (Wald=5.65,  $df=1$ ,  $p=0.017$ ), were significantly associated with those of the EPDS score.

## Discussion

### *Immune profiles of early prenatal depression*

The first major findings of this study are that a) all immune profiles (except CIRS) during early pregnancy were significantly linked with the EPDS score, independent of the effects of psychological variables and PMS; and b) elevated IL-4, IL-6, CXCL8 (IL-8), IL-12, IL-15, IL-17, and GM-CSF are the primary cytokines associated with prenatal depression. Previous research has shown that prenatal depression is accompanied by elevated C-reactive protein, a positive acute phase protein, and decreased zinc, a negative acute phase reactant, suggesting a modest inflammatory response [1,18]. Our findings that IL-6 is linked with the severity of prenatal depression are consistent with those of previous studies [19,34,35]. These authors also found that IL-1 $\beta$  [19] and TNF- $\alpha$  [34] may be related with moderate depression symptoms in early pregnancy to midgestation. In contrast to the findings of Sha et al. [19], we discovered that CXCL8 (IL-8) was associated with the severity of the condition. Increased CXCL8 was also detected by Corwin et al. [36] who reported that postpartum depression might be predicted by a high IL-8/IL-10 ratio. Karlsson et al. [37] found that although IL-6 and TNF- $\alpha$  were unrelated to prenatal symptoms of depression, IL-12, IL-9, and IL-13, as well as the IFN- $\gamma$ /IL-4 ratio and IL-5 were all positively associated with depressive symptoms.

In addition, Maes et al. [38] revealed that pregnant women with a history of major depression had elevated levels of IL-6 and soluble IL-1 receptor antagonist (sIL-1RA), suggesting sensitization of the immune-inflammatory response. In accordance, Christian et al. [39] observed that blood levels of macrophage migration inhibitory factor (MIF) were higher after one week of influenza vaccination in pregnant women with greater depressive ratings, suggesting immunological sensitization. Research has connected prenatal depression to

inflammatory pregnancy morbidities such as preeclampsia, preterm birth, and gestational diabetes [40-44].

Current hypotheses and reviews demonstrate that immunological pathways that contribute to non-pregnancy major depression also contribute to perinatal depression. Hence, Leff-Gelman et al. [45] postulated that the same immune-inflammatory pathways linked with major depression also operate in the placenta during prenatal depression. Activation of Toll-Like Receptors (TLR) in placental immune cells, for instance, may promote a Th1/Th17 shift with an increase in pro-inflammatory cytokines that cause depressive symptoms [45]. Our analysis demonstrates, however, that prenatal depression is accompanied by hyperactive Th-1 as well as Th-17 phenotypes. The comprehensive review of Roomruangwong et al. [1] reported that not all neuro-immune and neuro-oxidative pathways that define non-pregnancy-related depression have a role in perinatal depression, including increased bacterial translocation. The pregnancy-specific effects of sex hormones (oestrogen and progesterone) and the significant activation of the hypothalamic-pituitary-adrenal (HPA) axis during pregnancy may explain some of the discrepancies in the literature, as explained below.

#### *IRS and CIRS activity throughout the first trimester*

The second major finding is that, as with non-pregnancy-related MDD [20,22,23], prenatal depression severity is linked with greater IRS vs CIRS responses, despite the presence of a robust Th-2 response and elevated IL-4 levels. The latter may impose a negative feedback on M1 and Th-1 phenotypes [20]. Moreover, elevated glucocorticoid levels during pregnancy may attenuate the synthesis and release of Th-1 and M1 cytokines, encouraging a Th-2 shift [46]. Thus, the observed levels of IRS (M1, Th-1, and Th-17) and CIRS (Th-2, and Treg) cytokines throughout various phases of pregnancy are dictated by the tight balance between IRS and CIRS activity and elevated glucocorticoid levels. In the past, we have hypothesized



that enhanced HPA-axis activity during pregnancy may reduce IRS activation during pregnancy, while boosting Th-2 and Treg activity [1]. Complicating matters, there is a negative correlation between inflammatory markers and cortisone levels in healthy pregnant women, but not in those with prenatal depression [47,48], whereas other authors hypothesised that dysfunctions of the HPA-axis may be mediated by immunological and placental mechanisms [49]. Pregnancy-specific alterations in sex hormones, particularly progesterone, may further modulate the homeostatic setpoint between the IRS and CIRS phenotypes [1].

These hormonal changes may explain why the IRS pathway alterations seen in this study are substantially less profound than those observed in non-pregnant MDD/BD patients [20,22]. These hormonal effects may also explain why not all research on pro-inflammatory characteristics in prenatal or perinatal depression had positive outcomes. For example, a first investigation was unable to find a link between IL-6, soluble IL-6 receptor (sIL-6R) and sgp130 (thus measuring IL-6 signalling, including trans-signaling), sIL-1RA, and leukaemia inhibitory factor and postpartum depression, despite substantial correlations with postpartum blues [50]. A pilot study reported an inverse connection between IL-1 $\beta$ , TNF- $\alpha$ , and IL-17 and perinatal depression [51]. TRAIL (TNF- $\alpha$ -related apoptosis inducing ligand), M-CSF (macrophage colony-stimulating factor), and CX3CL1 (fractalkine) were reduced in prenatal depression, according to Edvinsson et al. [52].

#### *Variations in immune profiles between early and late pregnancy*

The third major finding of this study is that there was a shift in immune profiles from early to late pregnancy, characterised by a sharp increase in the IRS/CIRS ratio due to a decrease in CIRS and increases in the M1 and growth factor profiles, indicating that the other profiles (Th-1, Th-2, Th-17, and CIRS) remained more stable over time. Earlier, Blackmore et al. [53] demonstrated that cytokines, particularly IL-6 and TNF- $\alpha$ , are remarkably stable in

pregnant women. However, the actual changes in EPDS from early to late pregnancy were positively associated with Th-2 and Th-17 phenotypes, indicating that again, the balance between different types of IRS and CIRS (and glucocorticoids, and sex hormones) impact the severity of late prenatal depression, and consequently postnatal depression, which is strongly predicted by prenatal depression [1].

Pregnancy is known to cause alterations in the immune system's equilibrium. The invasion of the uterine epithelium by the blastocyst during implantation triggers an immune-inflammatory response [54-56], in which endometrial cells and immune cells alike produce increased quantities of IL-6, TNF- $\alpha$ , and CXCL8 [57]. In the second phase, the immune system gains a more anti-inflammatory mode [56], as seen by enhanced CIRS responses in our research. Induction of an inflammatory response in the latter days of pregnancy facilitates uterine contractions, birth, placental rejection, and protection against puerperal sepsis [56,58]. Hence, symptoms of enhanced peripheral inflammation are present towards the end of a full-term pregnancy, but are kept in check by heightened immunoregulatory feedback systems, which are achieved at least in part by higher HPA-axis activity and progesterone levels, as well as immunological homeostatic mechanisms [1]. As such, the immune pathophysiology of prenatal depression is not completely comparable with that of non-pregnancy-associated depression.

### *Results of cluster analysis*

The fourth major finding of this study is that we were able to identify a cluster of early pregnancy women with elevated EPDS scores, PMS, immunological profiles, adverse childhood experiences, and elevated current psychological stressors, such as unexpected pregnancy and intimate partner dissatisfaction. As a result, these early and current adverse life experiences, PMS, depressive symptoms, and IRS activation shape a cluster of pregnant

women that is well-defined. Notably, the latter class is statistically more significant than the diagnosis of prenatal depression as determined by an EPDS > 10 cutoff score. Moreover, this new phenotypic class was also characterized by increased levels of pro-inflammatory (IL-6, IL-8, IL-12, IL-15, IL-17 and GM-CSF) and anti-inflammatory (IL-4) cytokines. Our results suggest that the combined effects of these psychological (ACE and acute psychological stressors), biological (immune profiles and PMS) factors, and the ensuing early pregnancy-related depressive symptoms form a new phenotypic class. The latter combines a lifetime trajectory of psychological (ACE), hormonal stressors and neuro-immune pathways (PMS) with the ensuing prenatal depressive symptoms and activated immune networks.

In the current investigation, however, we determined that these factors yielded cumulative effects and that there were no significant connections between ACE or PMS and the immunological profiles of prenatal depression. In contrast to earlier research, which indicated that ACE, PMS or menstrual distress, and current psychological stressors impact indicators of immunological IRS activation, the current study revealed no such association. First, ACE were shown to be highly related with the stimulated production of cytokines, chemokines, and growth factors by stimulated whole blood culture supernatant, but not unstimulated whole blood culture supernatant, suggesting immunological sensitization to immune injury [22,23]. In the current investigation, however, we examined plasma levels of the immunological products, which are more closely related to unstimulated levels in culture supernatant than stimulated levels. Second, PMS and menstrual distress are related to elevated levels of proinflammatory chemokines, acute phase reactants, and tryptophan catabolites, which are triggered by inflammatory processes [13,25,59]. Third, even modest psychological stressors, such as examination stress, may stimulate the production of pro-inflammatory cytokines, including IL-6, TNF- $\alpha$ , and IFN- $\gamma$  [60]. Nevertheless, these changes are likely obscured by the impact of the greatly elevated HPA-axis activity and progesterone, which alter

the homeostatic equilibrium between IRS and CIRS phenotypes from early to late pregnancy. Our results that psychological stressors and PMS had less of an influence on the late EPDS score than the early EPDS score are similarly suggestive of such confounding effects.

## Limitations.

This work would have been more intriguing if we had assessed HPA-axis activity, plasma progesterone levels, as well as cytokines, chemokines, and growth factors in the supernatant of stimulated whole blood cultures.

## Conclusions

Independent of the impact of psychosocial factors and PMS, all immunological profiles, including M1, Th-1, Th-2, and IRS, were significantly correlated with the early EPDS score. Primary cytokines linked to prenatal depression severity include elevated levels of IL-4, IL-6, CXCL8, IL-12, IL-15, IL-17, and GM-CSF. Cluster analysis revealed that the combined impacts of ACE, relationship dissatisfaction, undesired pregnancy, PMS, and activated immunological profiles, as well as the resulting early depressive symptoms, define a new endophenotypic class. Immune profiles changed from early to late pregnancy, with a significant rise in the IRS/CIRS ratio. Immune profiles, specifically the Th-2 phenotype, predicted the actual changes in EPDS score from early to late pregnancy. Activation of the immune system contributes to the depressive symptoms during pregnancy.

## Acknowledgements

We are grateful to all the participants for their time and efforts for this study. We also acknowledge with appreciation the staff of ANC at Khon Kaen hospital who greatly helped with the data collection.

## **Declaration of Competing Interest**

The authors declare that they have no conflict of interests.

## **Funding**

This research is supported by the 90th Anniversary of Chulalongkorn University, Rachadapisek Sompote Fund.

## **Ethical statement**

Institutional Review Board (IRB) permission was received from both Khon Kaen Hospital and Chulalongkorn University (KEF62036 and COA No.280/2019). All women provided their informed consent in writing.

## **Author's contribution**

All the contributing authors have participated in the manuscript and approved the final version of the manuscript.

## **Data Access Statement**

The dataset generated during and/or analyzed during the current study will be available from the corresponding author upon reasonable request and once the dataset has been fully exploited by the authors.

## References

1. Roomruangwong, C.; Anderson, G.; Berk, M.; Stoyanov, D.; Carvalho, A.F.; Maes, M. A neuro-immune, neuro-oxidative and neuro-nitrosative model of prenatal and postpartum depression. *Prog Neuropsychopharmacol Biol Psychiatry*. 2018, 81, 262-274. doi: 10.1016/j.pnpbp.2017.09.015. Epub 2017 Sep 20. PMID: 28941769.
2. Gentile, S. Untreated depression during pregnancy: Short- and long-term effects in offspring. A systematic review. *Neuroscience* 2017, 342, 154-166. <https://doi:10.1016/j.neuroscience.2015.09.001>.
3. Grigoriadis, S.; VonderPorten, E.H.; Mamisashvili, L.; Tomlinson, G.; Dennis, C.L.; Koren, G.; Steiner, M.; Mousmanis, P.; Cheung, A.; Radford, K.; Martinovic, J.; Ross, L.E. The impact of maternal depression during pregnancy on perinatal outcomes: a systematic review and meta-analysis. *J. Clin. Psychiatry* 2013, 74(4), e321-341. <https://doi:10.4088/JCP.12r07968>.
4. Grote, N.K.; Bridge, J.A.; Gavin, A.R.; Melville, J.L.; Iyengar, S.; Katon, W.J. A Meta-analysis of Depression During Pregnancy and the Risk of Preterm Birth, Low Birth Weight, and Intrauterine Growth Restriction. *Arch. Gen Psychiatry* 2010, 67(10), 1012-1024. <https://doi:10.1001/archgenpsychiatry.2010.111>.
5. Hu, R.; Li, Y.; Zhang, Z.; Yan, W. Antenatal depressive symptoms and the risk of preeclampsia or operative deliveries: a meta-analysis. *PLoS One* 2015, 10(3). <https://doi:10.1371/journal.pone.0119018>.

6. Jarde, A.; Morais, M.; Kingston, D.; Giallo, R.; MacQueen, G.M.; Giglia, L.; Beyene, J.; Wang, Y.; McDonald, S.D. Neonatal Outcomes in Women With Untreated Antenatal Depression Compared With Women Without Depression: A Systematic Review and Meta-analysis. *Jama Psychiatry* 2016, 73(8), 826-837. <https://doi:10.1001/jamapsychiatry.2016.0934>.
  
7. Abe, Y.; Sirichokchatchawan, W.; Sangkomkamhang, U.; Satthapisit, S.; Maes M. Adverse childhood experiences combined with emotional and physical abuse by the partner predict antenatal depression. *J Affect Disord.* 2022, 298(Pt A), 194-201. doi: 10.1016/j.jad.2021.10.099. Epub 2021 Oct 27. PMID: 34715193.
  
8. Racine, N.M.; Madigan, S.L.; Plamondon, A.R.; McDonald, S.W.; Tough, S.C. Differential Associations of Adverse Childhood Experience on Maternal Health. *Am. J. Prevent. Med.* 2018, 54(3), 368-375. <https://doi:10.1016/j.amepre.2017.10.028>.
  
9. Racine, N.; Zumwalt, K.; McDonald, S.; Tough, S.; Madigan, S. Perinatal depression: The role of maternal adverse childhood experiences and social support. *J. Affect. Disord.* 2020, 263, 576-581. <https://doi:10.1016/j.jad.2019.11.030>.
  
10. Li, Y.; Long, Z.; Cao, D.; Cao, F. Maternal history of child maltreatment and maternal depression risk in the perinatal period: A longitudinal study. *Child Abuse & Neglect* 2017, 63, 192-201. <https://doi:10.1016/j.chiabu.2016.12.001>

11. Shamblaw, A.L.; Cardy, R.E.; Prost, E.; Harkness, K.L. Abuse as a risk factor for prenatal depressive symptoms: a meta-analysis. *Archives of Women's Mental Health*, 2019, 22, 199-213. <https://doi:10.1007/s00737-018-0900-8>.
  
12. Abe, Y.; Sirichokchatchawan, W.; Sangkomkamhang, U.; Sathapisit, S.; Maes, M. Antenatal depressive symptoms are strongly predicted by the severity of pre-menstrual syndrome: results of partial least squares analysis. *Int J Clin Health Psychol*. 2023, 23(2), 100356. doi: 10.1016/j.ijchp.2022.100356. Epub 2022 Nov 16. PMID: 36415609; PMCID: PMC9674907.
  
13. Roomruangwong, C.; Maes, M. Biomarker Validation of a New Case Definition of Menstrual Cycle-Associated Syndrome (MCAS) Opinion Paper. *CNS Neurol. Disord. Drug Targets*. 2021, 20(2), 105-111. doi: 10.2174/1871527319666200930095149. PMID: 32998680.
  
14. Roomruangwong, C.; Carvalho, A.F.; Comhaire, F.; Maes, M. Lowered Plasma Steady-State Levels of Progesterone Combined With Declining Progesterone Levels During the Luteal Phase Predict Peri-Menstrual Syndrome and Its Major Subdomains. *Front. Psychol*. 2019, 10, 2446. doi: 10.3389/fpsyg.2019.02446. PMID: 31736837; PMCID: PMC6831719.
  
15. Yonkers, K.A.; O'Brien, P.M.S.; Eriksson, E. Premenstrual syndrome. *The Lancet* 2008, 371, 1200-1210. [https://doi:10.1016/s0140-6736\(08\)60527-9](https://doi:10.1016/s0140-6736(08)60527-9).
  
16. Kwan, I.; Onwude, J.L. Premenstrual syndrome. *Br. Med. J. Clin. Evid*. 2015, 0806.



17. Anderson, G.; Maes, M. Postpartum depression: psychoneuroimmunological underpinnings and treatment. *Neuropsychiatr. Dis. Treat.* 2013, 9, 277-87. doi: 10.2147/NDT.S25320. Epub 2013 Feb 21. PMID: 23459664; PMCID: PMC3582478.
  
18. Roomruangwong, C.; Kanchanatawan, B.; Sirivichayakul, S.; Mahieu, B.; Nowak, G.; Maes, M. Lower Serum Zinc and Higher CRP Strongly Predict Prenatal Depression and Physio-somatic Symptoms, Which All Together Predict Postnatal Depressive Symptoms. *Mol. Neurobiol.* 2017, 54(2), 1500-1512. doi: 10.1007/s12035-016-9741-5. Epub 2016 Feb 5. PMID: 26846364.
  
19. Sha, Q.; Madaj, Z.; Keaton, S.; Escobar Galvis, M.L.; Smart, L.; Krzyzanowski, S.; Fazleabas, A.T.; Leach, R.; Postolache, T.T.; Achtyes, E.D.; Brundin, L. Cytokines and tryptophan metabolites can predict depressive symptoms in pregnancy. *Transl. Psychiatry* 2022, 12(1), 35. doi: 10.1038/s41398-022-01801-8. PMID: 35078975; PMCID: PMC8789799.
  
20. Maes, M.; Carvalho, A.F. The Compensatory Immune-Regulatory Reflex System (CIRS) in Depression and Bipolar Disorder. *Mol. Neurobiol.* 2018;55(12), 8885-8903. doi: 10.1007/s12035-018-1016-x. Epub 2018 Apr 2. PMID: 29611101.
  
21. Maes, M.; Rachayon, M.; Jirakran, K.; Sodsai, P.; Klinchanhom, S.; Debnath, M.; Basta-Kaim, A.; Kubera, M.; Almulla, A.F.; Sughondhabirrom, A. Adverse Childhood Experiences Predict the Phenome of Affective Disorders and These Effects Are Mediated by Staging, Neuroimmunotoxic and Growth Factor Profiles. *Cells* 2022, 11(9), 1564. doi: 10.3390/cells11091564. PMID: 35563878; PMCID: PMC9105661.

22. Maes, M.; Rachayon, M.; Jirakran, K.; Sodsai, P.; Klinchanhom, S.; Gałeczki, P.; Sughondhabirrom, A.; Basta-Kaim, A. The Immune Profile of Major Dysmood Disorder: Proof of Concept and Mechanism Using the Precision Nomothetic Psychiatry Approach. *Cells* 2022, 11(7), 1183. doi: 10.3390/cells11071183. PMID: 35406747; PMCID: PMC8997660.
  
23. Roomruangwong, C.; Matsumoto, A.K.; Michelin, A.P.; de Oliveira Semeão, L.; de Lima Pedrão, J.V.; Moreira, E.G.; Sirivichayakul, S.; Carvalho, A.; Barbosa, D.S.; Maes, M. The role of immune and oxidative pathways in menstrual cycle associated depressive, physiological, breast and anxiety symptoms: Modulation by sex hormones. *J. Psychosom. Res.* 2020, 135, 110158. doi: 10.1016/j.jpsychores.2020.110158. Epub 2020 May 23. PMID: 32526539.
  
24. Roomruangwong, C.; Sirivichayakul, S.; Carvalho, A.F.; Maes, M. The uterine-chemokine-brain axis: menstrual cycle-associated symptoms (MCAS) are in part mediated by CCL2, CCL5, CCL11, CXCL8 and CXCL10. *J. Affect. Disord.* 2020, 269, 85-93. doi: 10.1016/j.jad.2020.03.033. Epub 2020 Mar 19. PMID: 32217347.
  
25. Roomruangwong, C.; Sirivichayakul, S.; Matsumoto, A.K.; Michelin, A.P.; de Oliveira Semeão, L.; de Lima Pedrão, J.V.; Barbosa, D.S.; Moreira, E.G.; Maes, M. Menstruation distress is strongly associated with hormone-immune-metabolic biomarkers. *J. Psychosom. Res.* 2021, 142, 110355. doi: 10.1016/j.jpsychores.2020.110355. Epub 2021 Jan 2. PMID: 33444909.
  
26. Cox, J.L.; Holden, J.M.; Sagovsky, R. Detection of postnatal depression. Development of the 10-item Edinburgh Postnatal Depression Scale. *Br. J. Psychiatry* 1987, 150, 782-786. <https://doi:10.1192/bjp.150.6.782>.

27. Pitanupong, J.; Liabsuetrakul, T.; Vittayanont, A. Validation of the Thai Edinburgh Postnatal Depression Scale for screening postpartum depression. *Psychiatry Res.* 2007, 149(1-3), 253-259. <https://doi:10.1016/j.psychres.2005.12.011>
  
28. Phoosuwan, N.; Eriksson, L.; Lundberg, P.C. Antenatal depressive symptoms during late pregnancy among women in a north-eastern province of Thailand: Prevalence and associated factors. *Asian J. Psychiatry* 2018, 36, 102-107. <https://doi:10.1016/j.ajp.2018.06.012>.
  
29. McFarlane, J.P.; B.; Soeken, K.; Bullock, L. Assessing for Abuse During Pregnancy: Severity and Frequency of Injuries and Associated Entry Into Prenatal Care. *Jama - Journal of the American Medical Association* 1992, 267(23), 3176-3178. <https://doi:doi:10.1001/jama.267.23.3176>.
  
30. Deshpande, N.A.; Lewis-O'Connor, A. Screening for Intimate Partner Violence During Pregnancy. *Rev. Obstetr. Gynecol.* 2013, 6, 141-148. <https://doi:10.3909/riog0226>
  
31. Zimet, G.D.; Dahlem, N.W.; Zimet, S.G.; Farley, G.K. The Multidimensional Scale of Perceived Social Support. *J. Personality Assessm.* 1988, 52(1), 30-41. [https://doi:10.1207/s15327752jpa5201\\_2](https://doi:10.1207/s15327752jpa5201_2)
  
32. Felitti, V.J.; Anda, R.F.; Nordenberg, D.; Williamson, D.F.; Spitz, A.M.; Edwards, V.; Koss, M.P.; Marks, J.S. Relationship of childhood abuse and household dysfunction to many of the leading causes of death in adults. The Adverse Childhood Experiences (ACE) Study. *Am. J. Prevent. Med.* 1998, 14(4), 245-258. [https://doi:10.1016/s0749-3797\(98\)00017-8](https://doi:10.1016/s0749-3797(98)00017-8).

33. Steiner, M.; Macdougall, M.; Brown, E. The premenstrual symptoms screening tool (PSST) for clinicians. *Arch Women's Ment. Health* 2003, 6, 203-209. <https://doi:10.1007/s00737-003-0018-4>.
  
34. Azar, R.; Mercer, D. Mild depressive symptoms are associated with elevated C-reactive protein and proinflammatory cytokine levels during early to midgestation: a prospective pilot study. *J. Womens Health (Larchmt)* 2013, 22(4), 385-389. doi: 10.1089/jwh.2012.3785. Epub 2012 Oct 9. PMID: 23046044; PMCID: PMC3627429.
  
35. Blackmore, E.R.; Growth, S.W.; Chen, D.G.; Gilchrist, M.A.; O'Connor, T.G.; Moynihan, J.A. Depressive symptoms and proinflammatory cytokines across the perinatal period in African American women. *J. Psychosom. Obstetr. Gynaecol.* 2014, 35(1), 8-15. doi: 10.3109/0167482X.2013.868879. Epub 2013 Dec 18. PMID: 24350831.
  
36. Corwin, E.J.; Pajer, K.; Paul, S.; Lowe, N.; Weber, M.; McCarthy, D.O. Bidirectional psychoneuroimmune interactions in the early postpartum period influence risk of postpartum depression. *Brain Behav. Immun.* 2015, 49, 86-93. doi: 10.1016/j.bbi.2015.04.012. Epub 2015 Apr 29. PMID: 25937051; PMCID: PMC4567438.
  
37. Karlsson, L.; Nousiainen, N.; Scheinin, N.M.; Maksimow, M.; Salmi, M.; Lehto, S.M.; Tolvanen, M.; Lukkarinen, H.; Karlsson, H. Cytokine profile and maternal depression and anxiety symptoms in mid-pregnancy-the FinnBrain Birth Cohort Study. *Arch. Womens Ment. Health* 2017, 20(1), 39-48. doi: 10.1007/s00737-016-0672-y. Epub 2016 Oct 4. PMID: 27699637.

38. Maes, M.; Ombelet, W.; De Jongh, R.; Kenis, G.; Bosmans, E. The inflammatory response following delivery is amplified in women who previously suffered from major depression, suggesting that major depression is accompanied by a sensitization of the inflammatory response system. *J. Affect. Disord.* 2001, 63(1-3), 85-92. doi: 10.1016/s0165-0327(00)00156-7. PMID: 11246084.
39. Christian, L.M.; Franco, A.; Iams, J.D.; Sheridan, J.; Glaser, R. Depressive symptoms predict exaggerated inflammatory responses to an in vivo immune challenge among pregnant women. *Brain Behav. Immun.* 2010, 24(1), 49-53. doi: 10.1016/j.bbi.2009.05.055. Epub 2009 May 21. PMID: 19464358; PMCID: PMC2787729.
40. Alder, J.; Fink, N.; Bitzer, J.; Hösli, I.; Holzgreve, W. Depression and anxiety during pregnancy: a risk factor for obstetric, fetal and neonatal outcome?. A critical review of the literature. *J. Matern. Fetal Neonatal. Med.* 2007, 20, 189–209.
41. Kharaghani, R.; Geranmaye, M.; Janani, L.; Hantooshzade, S.; Arbabi, M.; Rahmani Bilandi, R.; Bagheri, F. Preeclampsia and depression: a case-control study in Tehran. *Arch. Gynecol. Obstet.* 2012, 286, 249–253.
42. Kozhimannil, K.B.; Pereira, M.A.; Harlow, B.L. Association between diabetes and perinatal depression among low-income mothers. *JAMA* 2009, 301, 842–847.
43. Kurki, T.; Hiilesmaa, V.; Raitasalo, R.; Mattila, H.; Ylikorkala, O. Depression and anxiety in early pregnancy and risk for preeclampsia. *Obstet. Gynecol.* 2000, 95, 487–490.

44. Orr, S.T.; James, S.A.; Prince, C.B. Maternal prenatal depressive symptoms and spontaneous preterm birth among African-American women in Baltimore Maryland. *Am. J. Epidemiol.* 2002, 156, 797–780.
45. Leff-Gelman, P.; Mancilla-Herrera, I.; Flores-Ramos, M.; Cruz-Fuentes, C.; Reyes-Grajeda, J.P.; García-Cuétara, M.; del, P.; Bugnot-Pérez, M.D.; Pulido-Ascencio, D.E. The Immune System and the Role of Inflammation in Perinatal Depression. *Neurosci Bull.* 2016, 32(4), 398-420. doi: 10.1007/s12264-016-0048-3. Epub 2016 Jul 18. PMID: 27432060; PMCID: PMC5563787.
46. Elenkov, I.J. Glucocorticoids and the Th1/Th2 balance. *Ann. N. Y. Acad. Sci.* 2004, 1024, 138-46. doi: 10.1196/annals.1321.010. PMID: 15265778.
47. Hellgren, C.; Akerud, H.; Skalkidou, A.; Sundstrom-Poromaa, I. Cortisol awakening response in late pregnancy in women with previous or ongoing depression. *Psychoneuroendocrinology* 2013, 38, 3150–3154.
48. Horowitz, M.A.; Zunszain, P.A.; Anacker, C.; Musaelyan, K.; Pariante, C.M. Glucocorticoids and inflammation: a double-headed sword in depression? How do neuroendocrine and inflammatory pathways interact during stress to contribute to the pathogenesis of depression? *Modern Trends Pharmacopsychiatr.* 2013, 28, 127–143.

49. Gelman, P.L.; Flores-Ramos, M.; López-Martínez, M.; Fuentes, C.C.; Grajeda, J.P. Hypothalamic-pituitary-adrenal axis function during perinatal depression. *Neurosci. Bull.* 2015, 31, 338-350.
  
50. Maes, M.; Lin, A.H.; Ombelet, W.; Stevens, K.; Kenis, G.; De Jongh, R.; Cox, J.; Bosmans, E. Immune activation in the early puerperium is related to postpartum anxiety and depressive symptoms. *Psychoneuroendocrinology*. 2000, 25(2), 121-37. doi: 10.1016/s0306-4530(99)00043-8. PMID: 10674277.
  
51. Shelton, M.M.; Schminkey, D.L.; Groer, M.W. Relationships among prenatal depression, plasma cortisol, and inflammatory cytokines. *Biol. Res. Nurs.* 2015, 17, 295-302.
  
52. Edvinsson, Å.; Bränn, E.; Hellgren, C.; Freyhult, E.; White, R.; Kamali-Moghaddam, M.; Olivier, J.; Bergquist, J.; Boström, A.E.; Schiöth, H.B.; Skalkidou, A.; Cunningham, J.L.; Sundström-Poromaa, I. Lower inflammatory markers in women with antenatal depression brings the M1/M2 balance into focus from a new direction. *Psychoneuroendocrinology* 2017, 80, 15-25.
  
53. Blackmore, E.R.; Moynihan, J.A.; Rubinow, D.R.; Pressman, E.K.; Gilchrist, M.; O'Connor, T.G. Psychiatric symptoms and proinflammatory cytokines in pregnancy. *Psychosom. Med.* 2011, 73(8), 656-663. doi: 10.1097/PSY.0b013e31822fc277. Epub 2011 Sep 23. PMID: 21949424; PMCID: PMC3188677.
  
54. Abrahams, V.M.; Kim, Y.M.; Straszewski, S.L.; Romero, R.; Mor, G. Macrophages and apoptotic cell clearance during pregnancy. *Am. J. Reprod. Immunol.* 2004, 51, 275-282

55. Dekel, N.; Gnainsky, Y.; Granot, I.; Mor, G. Inflammation and implantation. *Am. J. Reprod. Immunol.* 2010, 63, 17-21.
56. Mor, G.; Cardenas, I.; Abrahams, V.; Guller, S. Inflammation and pregnancy: the role of the immune system at the implantation site. *Ann. N.Y. Acad. Sci.* 2011, 1221, 80-87.
57. Manaster, I.; Mandelboim, O. The unique properties of uterine NK cells. *Am. J. Reprod. Immunol.* 2010, 63, 434-444.
58. Romero, R.; Espinoza, J.; Kusanovic, J.P.; Gotsch, F.; Hassan, S.; Erez, O.; Chaiworapongsa, T.; Mazar, M. The preterm parturition syndrome. *BJOG.* 2006, 113, 17-42.
59. Roomruangwong, C.; Kanchanatawan, B.; Sirivichayakul, S.; Anderson, G.; Carvalho, A.F.; Duleu, S.; Geffard, M.; Maes, M. IgA/IgM responses to tryptophan and tryptophan catabolites (TRYCATs) are differently associated with prenatal depression, physio-somatic symptoms at the end of term and premenstrual syndrome. *Mol. Neurobiol.* 2017, 54(4), 3038-3049. doi: 10.1007/s12035-016-9877-3. Epub 2016 Apr 1. PMID: 27037573.
60. Maes, M.; Song, C.; Lin, A.; De Jongh, R.; Van Gastel, A.; Kenis, G.; Bosmans, E.; De Meester, I.; Benoy, I.; Neels, H.; Demedts, P.; Janca, A.; Scharpé, S.; Smith RS. The effects of psychological stress on humans: increased production of pro-inflammatory cytokines and a Th1-like response in stress-induced anxiety. *Cytokine.* 1998, 10(4), 313-318. doi: 10.1006/cyto.1997.0290. PMID: 9617578.



**Figure 1.** Results of cluster analysis performed on EPDS (Edinburgh Postnatal Depression Scale) scores and immune profiles.

M1: macrophage M1, Th: T helper, IRS: immune-inflammatory response system, CIRS: compensatory immunoregulatory system, GF: growth factors, ResEPDS (residualized EPDS after covarying for psychological stressors). All measurements (except CIRS) are significantly higher in cluster 2 than in cluster 1.

**Figure 2.** Partial regression of the early EPDS (Edinburgh Postnatal Depression Scale) score on the T helper 1 profile.

**Figure 3.** Partial regression of the early EPDS (Edinburgh Postnatal Depression Scale) score on the T helper 17 profile.

Tables 1. Socio-demographic and clinical data of the cluster analysis-generated classes

| Variables                                  | Cluster 1<br>N=76 | Cluster 2<br>N=44 | F, $\chi^2$ | df    | p      |
|--------------------------------------------|-------------------|-------------------|-------------|-------|--------|
| Early EPDS                                 | 3.42 (2.55)       | 10.41 (4.53)      | 117.45      | 1/118 | <0.001 |
| Residualized early EPDS                    | -0.378 (0.879)    | 0.653 (0.853)     | 39.20       | 1/118 | <0.001 |
| Late EPDS                                  | 4.34 (2.78)       | 6.29 (4.15)       | 7.42        | 1/118 | 0.008  |
| Age (years)                                | 27.0 (5.2)        | 27.5 (6.1)        | 0.23        | 1/118 | 0.635  |
| Gravidity (1 / 2 / $\geq 3$ )              | 25/35/16          | 19/13/12          | 3.17        | 2     | 0.205  |
| Parity (0 / 1 / $\geq 2$ )                 | 28/42/6           | 21/17/6           | 3.29        | 2     | 0.193  |
| History of Caesarian delivery (N/Y)        | 64/12             | 37/7              | 0.00        | 1     | 1.0    |
| Basal body mass index (kg/m <sup>2</sup> ) | 23.2 (5.6)        | 23.6 (4.7)        | 0.16        | 1/118 | 0.689  |
| Premenstrual syndrome (N/Y)                | 70/6              | 31/13             | 9.80        | 1     | 0.002  |
| PSST_depression                            | -0.359 (0.702)    | 0.619 (1.134)     | 34.05       | 1/118 | <0.001 |
| PSST_physiosom                             | -0.172 (0.951)    | 0.297 (1.022)     | 6.42        | 1/118 | 0.013  |
| PSST_interference                          | -0.352 (0.740)    | 0.607 (1.103)     | 32.40       | 1/118 | <0.001 |
| PSST_total                                 | 24.21 (4.95)      | 30.43 (7.38)      | 30.41       | 1/118 | <0.001 |
| Planned pregnancy (N/Y)                    | 19/57             | 25/19             | 12.15       | 1     | <0.001 |
| Intimate relation satisfaction (N/Y)       | 0/76              | 10/34             | 18.84       | 1     | <0.001 |
| AAS1 (N/Y)                                 | 69/7              | 33/11             | 5.45        | 1     | 0.020  |
| ACE psychological abuse                    | 2.33 (0.87)       | 2.93 (1.55)       | 7.49        | 1/118 | 0.007  |
| ACE physical abuse                         | 2.03 (0.16)       | 2.43 (1.26)       | 7.64        | 1/118 | 0.007  |

|                              |              |               |      |       |       |
|------------------------------|--------------|---------------|------|-------|-------|
| ACE sexual abuse             | 0.05 (0.36)  | 1.37 (0.41)   | 1.36 | 1/118 | 0.246 |
| ACE All_abuse                | 4.40 (0.94)  | 5.50 (2.80)   | 9.72 | 1/118 | 0.002 |
| ACE Any neglect              | 17.07 (6.31) | 19.36 (7.73)  | 3.13 | 1/118 | 0.080 |
| ACE_Family dysfunction abuse | 8.50 (1.18)  | 10.05 (4.30)  | 8.72 | 1/118 | 0.004 |
| ACE1                         | 1.24 (0.61)  | 11.66 (0.99)  | 8.42 | 1/118 | 0.004 |
| ACE_total                    | 26.01 (6.89) | 30.05 (10.50) | 6.44 | 1/118 | 0.012 |
| MSPSS_friends                | 5.54 (1.06)  | 4.98 (1.27)   | 6.62 | 1/118 | 0.011 |

All results are shown as mean (SD) or as frequencies. F/ $\chi^2$  all results of analysis of variance (ANOVA), and analysis of contingency tables ( $\chi^2$ -Test)  
EPDS: Edinburgh Postnatal Depression Scale, total score; Residualized EPDS: after covarying for the effects of all psychological stressors; PSST\_: principal components extracted from the Premenstrual Symptoms Screening Test (PSST) score (depression, psychosomatic or interference domains); AAS1: Abuse Assessment Screen, first item (experience of emotional or physical abuse); ACE1: Adverse Childhood Experiences, first item (psychological abuse); ACE\_FDA: Family Dysfunction Abuse; MSPSS: Multidimensional Scale of Perceived Social Support, friends subdomain;

**Table 2.** Results of multiple regression analysis with the early pregnancy Edinburgh Postnatal Depression Scale (EPDS) score as dependent variable and the early immune profiles or single cytokine values as explanatory variables

| Profile       | B     | SE    | $\beta$ | t     | p     |
|---------------|-------|-------|---------|-------|-------|
| M1            | 0.716 | 0.290 | 0.159   | 2.47  | 0.016 |
| Th-1          | 0.968 | 0.291 | 0.214   | 3.33  | 0.001 |
| Th-2          | 0.722 | 0.302 | 0.157   | 2.39  | 0.019 |
| Th-17         | 0.934 | 0.277 | 0.202   | 3.73  | 0.001 |
| IRS           | 0.964 | 0.290 | 0.211   | 3.319 | 0.001 |
| CIRS          | 0.564 | 0.287 | 0.132   | 1.970 | 0.052 |
| GF            | 0.609 | 0.298 | 0.129   | 2.04  | 0.044 |
| Chemokines    | 0.431 | 0.306 | 0.092   | 1.41  | 0.193 |
| IRS/CIRS      | 0.684 | 0.300 | 0.149   | 2.28  | 0.025 |
| CXCL8 or IL-8 | 0.145 | 0.069 | 0.131   | 2.10  | 0.038 |
| IL-15         | 0.882 | 0.276 | 0.191   | 3.19  | 0.002 |
| IL-17         | 0.907 | 0.267 | 0.211   | 3.40  | 0.001 |
| GM-CSF        | 0.148 | 0.067 | 0.134   | 2.21  | 0.029 |

M1: macrophage M1, Th: T helper, IRS: immune-inflammatory response system, CIRS: compensatory immunoregulatory system, GF: growth factors, IL: interleukin, GM-CSF: granulocyte-macrophage colony stimulating factor.

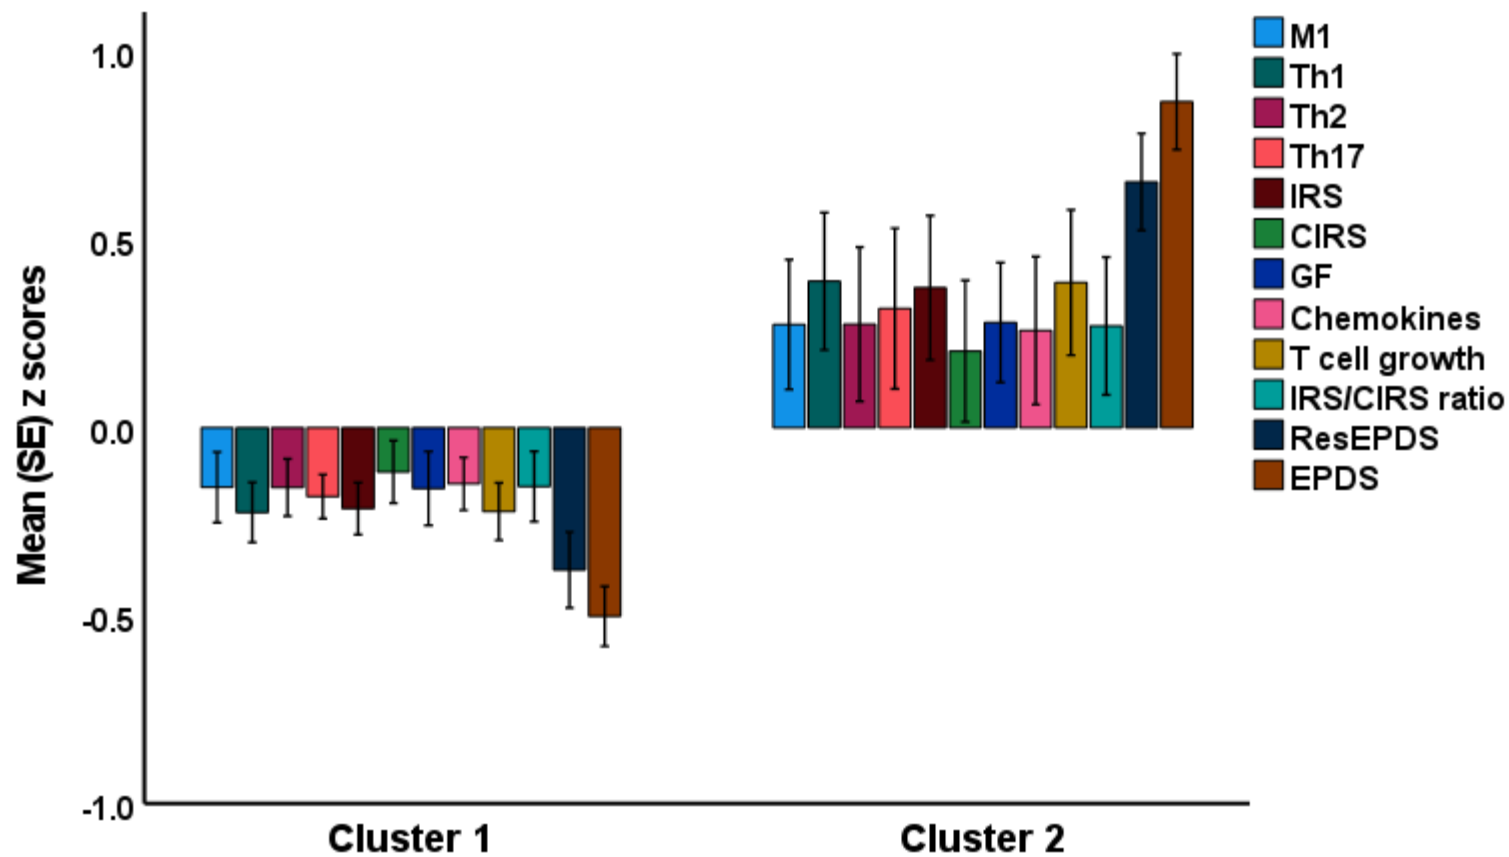

**Figure 1.** Results of cluster analysis performed on EPDS (Edinburgh Postnatal Depression Scale) scores and immune profiles.

M1: macrophage M1, Th: T helper, IRS: immune-inflammatory response system, CIRS: compensatory immunoregulatory system, GF: growth factors, ResEPDS (residualized EPDS after covarying for psychological stressors). All measurements (except CIRS) are significantly higher in cluster 2 than in cluster 1.

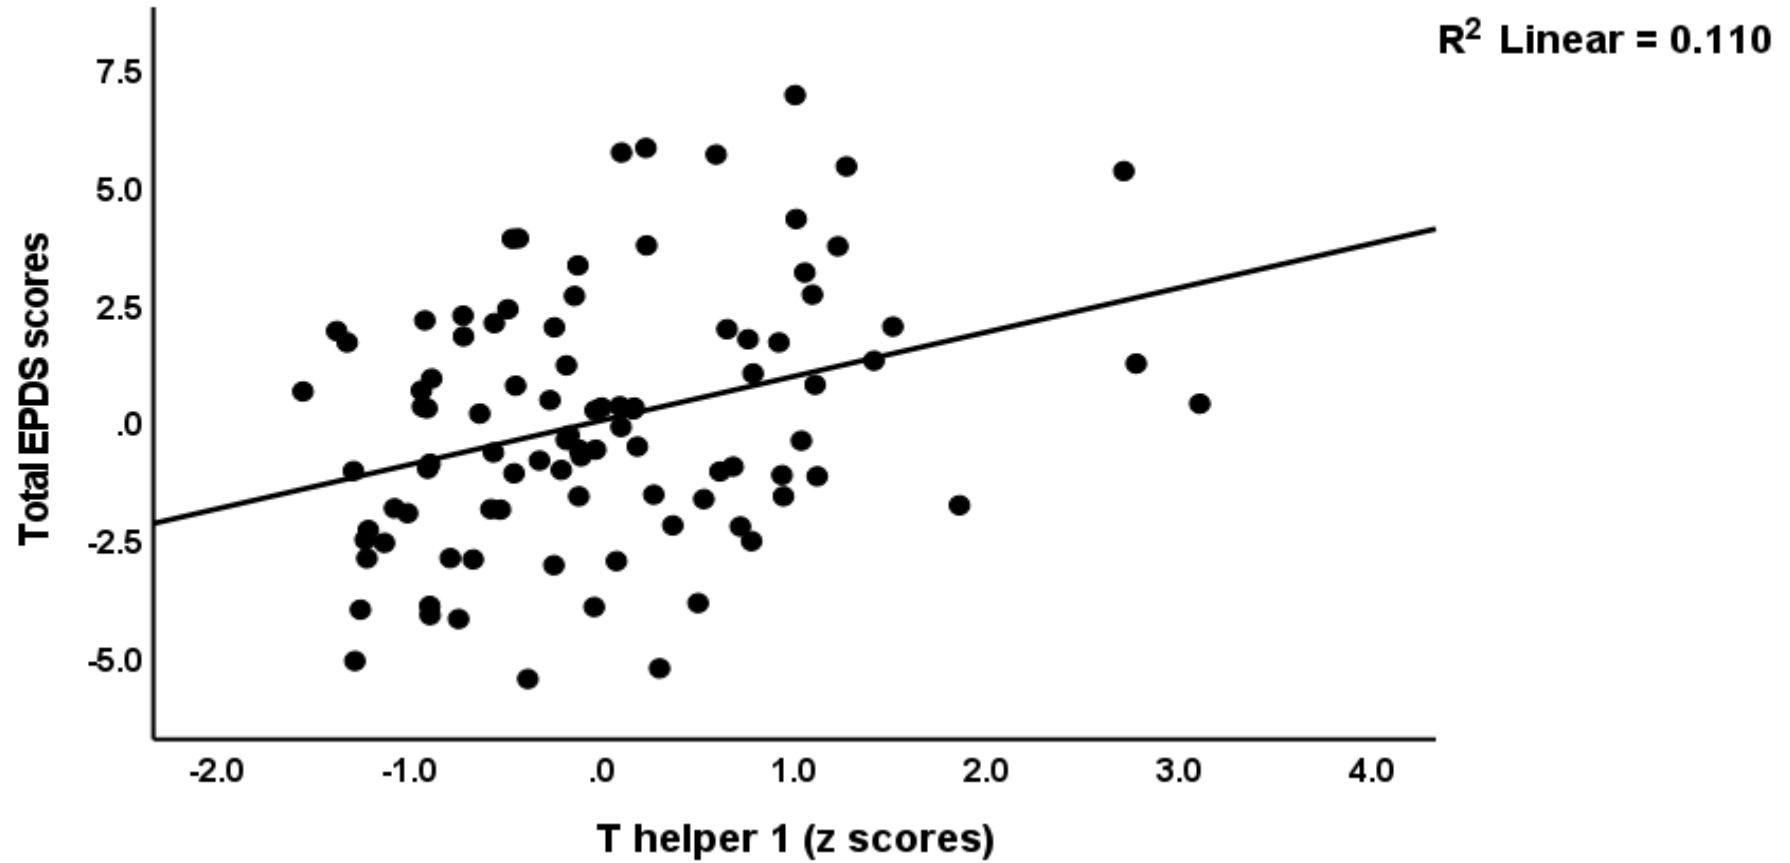

**Figure 2.** Partial regression of the early EPDS (Edinburgh Postnatal Depression Scale) score on the T helper 1 profile.

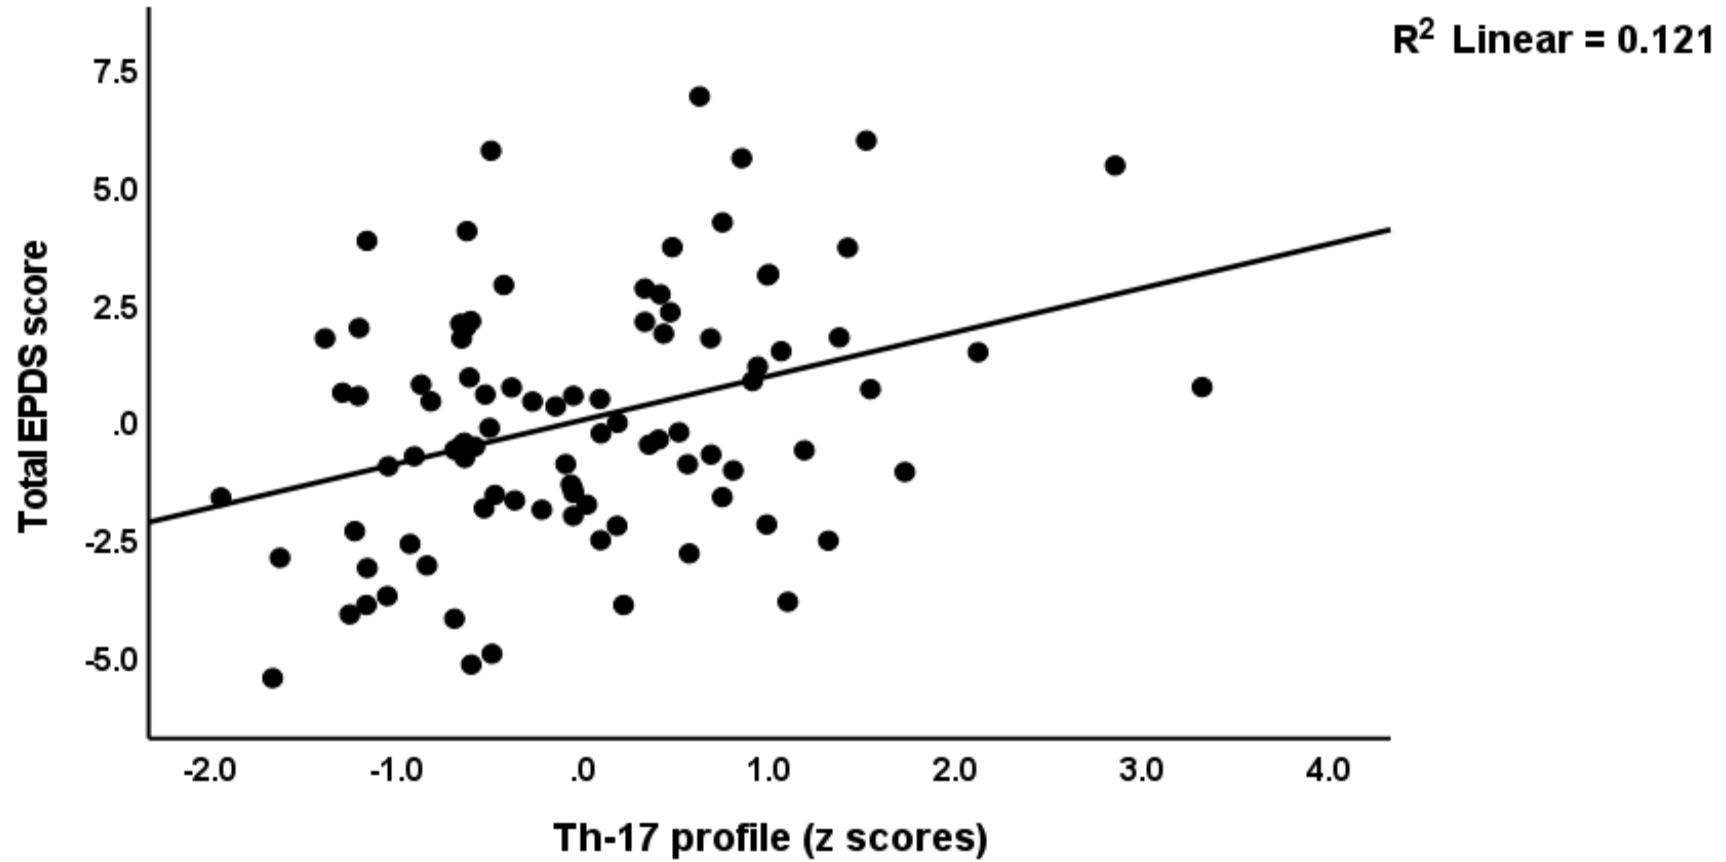

**Figure 3.** Partial regression of the early EPDS (Edinburgh Postnatal Depression Scale) score on the T helper 17 profile.

## **The cytokine, chemokine, and growth factor network of prenatal depression**

(1-5) Michael Maes, (6,7) Yoshiko Abe, (6,8) Wandee Sirichokchatchawan, (9) Junpen Suwimonteerabutr, (10) Ussanee Sangkomkamhangd, (1, 11) Abbas F. Almulla, (12) Sirina Satthapisit

(1) Department of Psychiatry, Faculty of Medicine, Chulalongkorn University and King Chulalongkorn Memorial Hospital, the Thai Red Cross Society, Bangkok, Thailand

(2) Kyung Hee University, 26 Kyungheedaero, Dongdaemun-gu, Seoul 02447, Korea

(3) Department of Psychiatry, Medical University of Plovdiv, Plovdiv, Bulgaria

(4) Research Institute, Medical University of Plovdiv, Plovdiv, Bulgaria

(5) IMPACT Strategic Research Center, Barwon Health, Geelong, Australia

(6) College of Public Health Sciences (CPHS), Chulalongkorn University, Bangkok 10330, Thailand

(7) Department of Public Health, Dokkyo Medical University School of Medicine, Tochigi 321-0293, Japan

(8) Health and Social Sciences and Addiction Research Unit, Chulalongkorn University, Bangkok, Thailand

(9) Department of Obstetrics, Gynaecology and Reproduction, Faculty of Veterinary Science, Chulalongkorn University, Bangkok 10330, Thailand



(10) Department of Obstetrics and Gynecology, Khon Kaen Hospital, Khon Kaen 40000, Thailand

(11) Medical Laboratory Technology Department, College of Medical Technology, The Islamic University, Najaf, Iraq.

(12) Department of Psychiatry, Khon Kaen Hospital, Khon Kaen 40000, Thailand

**ESF, Table 1.** Cytokines, chemokines and growth factors measured in the current study

| <b>Protein abbreviations</b> | <b>Gene ID</b> | <b>Protein name</b>                                                              | <b>Cases with values &gt; lower limit OOR</b> |
|------------------------------|----------------|----------------------------------------------------------------------------------|-----------------------------------------------|
| IL-1 $\beta$                 | IL1B           | Interleukin-1 $\beta$                                                            | 33.3%                                         |
| IL-1RA                       | IL1RN          | Interleukin-1 receptor antagonist                                                | 87.5%                                         |
| IL-2                         | IL2            | Interleukin-2                                                                    | 8.8%                                          |
| IL-4                         | IL4            | Interleukin-4                                                                    | 69.9%                                         |
| IL-5                         | IL5            | Interleukin-5                                                                    | 0%                                            |
| IL-6                         | IL6            | Interleukin-6                                                                    | 42.3%                                         |
| IL-7                         | IL7            | Interleukin-7                                                                    | 28.7%                                         |
| CXCL8 / IL-8                 | CXCL8          | C-X-C motif chemokine ligand 8                                                   | 89.8%                                         |
| IL-9                         | IL9            | Interleukin-9                                                                    | 99.5%                                         |
| IL-10                        | IL10           | Interleukin-10                                                                   | 19.4%                                         |
| IL-12p70                     | IL12           | Interleukin-12                                                                   | 56.9%                                         |
| IL-13                        | IL13           | Interleukin-13                                                                   | 65.7%                                         |
| IL-15                        | IL15           | Interleukin-15                                                                   | 42.1%                                         |
| IL-17                        | IL17           | Interleukin-17                                                                   | 40.7%                                         |
| CCL11                        | CCL11          | Eotaxin                                                                          | 99.5%                                         |
| FGF2                         | FGF2           | Fibroblast growth factor 2, Basic fibroblast growth factor                       | 95.8%                                         |
| G-CSF                        | CSF3           | Granulocyte Colony Stimulating Factor, Colony Stimulating Factor 3 (Granulocyte) | 96.3%                                         |
| GM-CSF                       | CSF2           | Granulocyte-macrophage colony-stimulating factor, Colony-stimulating factor 2    | 63.0%                                         |
| IFN- $\gamma$                | IFNG           | Interferon- $\gamma$                                                             | 38.0%                                         |
| CXCL10 /IP-10                | CXCL10         | C-X-C motif chemokine ligand 8, Interferon gamma-induced protein 10              | 100%                                          |
| CCL2 / MCP1                  | CCL2           | C-C Motif Chemokine Ligand 2                                                     | 99.5%                                         |

|                       |       |                                                                                                            |       |
|-----------------------|-------|------------------------------------------------------------------------------------------------------------|-------|
| CCL3 / MIP-1 $\alpha$ | CCL3  | Macrophage inflammatory protein-1 alpha, C-C Motif Chemokine Ligand 3                                      | 97.0% |
| PDGF                  | PDGFB | Platelet Derived Growth Factor Subunit B                                                                   | 99.5% |
| CCL4 / MIP-1 $\beta$  | CCL4  | C-C Motif Chemokine Ligand 4, Macrophage Inflammatory Protein 1-Beta, Lymphocyte Activation Gene 1 Protein | 99.5% |
| CCL5 /RANTES          | CCL5  | C-C Motif Chemokine Ligand 5, Regulated Upon Activation, Normally T-Expressed, And Presumably Secreted     | 30.1% |
| TNF- $\alpha$         | TNF   | Tumor Necrosis Factor-Alpha                                                                                | 99.1% |
| VEGF                  | VEGFA | Vascular Endothelial Growth Factor                                                                         | 21.3% |

**ESF, Table 2.** Computation of the immune profile composite scores assessed in this study

| <b>Immune Profile</b> | <b>Members</b>                                                                                                                 |
|-----------------------|--------------------------------------------------------------------------------------------------------------------------------|
| <b>M1 macrophage</b>  | IL-1 $\beta$ , sIL-1RA, IL-6, TNF- $\alpha$ , CXCL8, CCL3                                                                      |
| <b>T helper-1</b>     | IL-2, IFN- $\gamma$ , IL-12                                                                                                    |
| <b>T helper-2</b>     | IL-4, IL-5, IL-9, IL-13                                                                                                        |
| <b>T helper-17</b>    | IL-6, IL-17                                                                                                                    |
| <b>IRS</b>            | IL-1 $\beta$ , IL-6, TNF- $\alpha$ , CXCL8, CCL3, IL-2, IFN- $\gamma$ , IL-12, IL-17, IL-15, G-CSF, GM-CSF, CXCL10, CCL5, CCL2 |
| <b>CIRS</b>           | IL-4, IL-10, sIL-1RA                                                                                                           |
| <b>Growth factors</b> | FGF, PDGF, VEGF                                                                                                                |
| <b>Chemokines</b>     | CXCL8, CXCL10, CCL2, CCL3, CCL4, CCL5, CCL11                                                                                   |
| <b>T cell growth</b>  | IL4, IL9, IL12, GM-CSF, IL-15                                                                                                  |
| <b>IRS/CIRS</b>       | (All IRS) / (All CIRS)                                                                                                         |

IRS: immune-inflammatory response system; CIRS: compensatory immunoregulatory system

**ESF2, Table 3.** Results of univariate GLM analyses of the immune profiles and the two-step-cluster analysis-generated classes with age and BMI as covariates.

| Estimates          |           |                    |            |                         |             |
|--------------------|-----------|--------------------|------------|-------------------------|-------------|
| Dependent Variable | Clusters  | Mean               | Std. Error | 95% Confidence Interval |             |
|                    |           |                    |            | Lower Bound             | Upper Bound |
| M1                 | Cluster 1 | -.159 <sup>a</sup> | .110       | -.377                   | .059        |
|                    | Cluster 2 | .275 <sup>a</sup>  | .145       | -.012                   | .562        |
| Th1                | Cluster 1 | -.226 <sup>a</sup> | .106       | -.437                   | -.015       |
|                    | Cluster 2 | .390 <sup>a</sup>  | .140       | .114                    | .667        |
| Th2                | Cluster 1 | -.160 <sup>a</sup> | .113       | -.384                   | .064        |
|                    | Cluster 2 | .276 <sup>a</sup>  | .149       | -.019                   | .570        |
| Th17               | Cluster 1 | -.184 <sup>a</sup> | .110       | -.401                   | .033        |
|                    | Cluster 2 | .318 <sup>a</sup>  | .144       | .032                    | .603        |
| IRS                | Cluster 1 | -.216 <sup>a</sup> | .105       | -.424                   | -.008       |
|                    | Cluster 2 | .373 <sup>a</sup>  | .138       | .100                    | .646        |
| CIRS               | Cluster 1 | -.118 <sup>a</sup> | .110       | -.336                   | .100        |
|                    | Cluster 2 | .204 <sup>a</sup>  | .145       | -.082                   | .490        |
| GF                 | Cluster 1 | -.162 <sup>a</sup> | .108       | -.377                   | .052        |
|                    | Cluster 2 | .280 <sup>a</sup>  | .142       | -.001                   | .562        |
| Chemokines         | Cluster 1 | -.150 <sup>a</sup> | .107       | -.362                   | .062        |
|                    | Cluster 2 | .259 <sup>a</sup>  | .141       | -.020                   | .538        |
| TcellG             | Cluster 1 | -.224 <sup>a</sup> | .109       | -.439                   | -.009       |
|                    | Cluster 2 | .387 <sup>a</sup>  | .143       | .104                    | .670        |
| IRS/CIRS           | Cluster 1 | -.157 <sup>a</sup> | .113       | -.382                   | .067        |
|                    | Cluster 2 | .271 <sup>a</sup>  | .149       | -.024                   | .566        |

a. Covariates appearing in the model are evaluated at the following values: Age = 27.21, BMI = 23.320.

### Univariate Tests

| Dependent Variable |          | Sum of Squares | df  | Mean Square | F      | Sig.  |
|--------------------|----------|----------------|-----|-------------|--------|-------|
| M1                 | Contrast | 5.241          | 1   | 5.241       | 5.694  | .019  |
|                    | Error    | 106.772        | 116 | .920        |        |       |
| Th1                | Contrast | 10.561         | 1   | 10.561      | 12.297 | <.001 |
|                    | Error    | 99.625         | 116 | .859        |        |       |
| Th2                | Contrast | 5.269          | 1   | 5.269       | 5.422  | .022  |
|                    | Error    | 112.731        | 116 | .972        |        |       |
| Th17               | Contrast | 6.989          | 1   | 6.989       | 7.652  | .007  |
|                    | Error    | 105.948        | 116 | .913        |        |       |
| IRS                | Contrast | 9.637          | 1   | 9.637       | 11.537 | <.001 |
|                    | Error    | 96.898         | 116 | .835        |        |       |
| CIRS               | Contrast | 2.882          | 1   | 2.882       | 3.138  | .079  |
|                    | Error    | 106.534        | 116 | .918        |        |       |
| GF                 | Contrast | 5.443          | 1   | 5.443       | 6.128  | .015  |
|                    | Error    | 103.022        | 116 | .888        |        |       |
| Chemokines         | Contrast | 4.647          | 1   | 4.647       | 5.324  | .023  |
|                    | Error    | 101.253        | 116 | .873        |        |       |
| TcellG             | Contrast | 10.368         | 1   | 10.368      | 11.590 | <.001 |
|                    | Error    | 103.769        | 116 | .895        |        |       |
| IRS/CIRS           | Contrast | 5.097          | 1   | 5.097       | 5.224  | .024  |

|       |         |     |      |  |  |
|-------|---------|-----|------|--|--|
| Error | 113.177 | 116 | .976 |  |  |
|-------|---------|-----|------|--|--|

The F tests the effect of Clusters. This test is based on the linearly independent pairwise comparisons among the estimated marginal means.

**ESF, Table 4.** Results of univariate GLM analyses of the single cytokines and growth factors and the two-step-cluster (TSC)-analysis-generated classes with age and BMI as covariates.

| Dependent Variable | Clusters  | Estimates          |            |                         |             |
|--------------------|-----------|--------------------|------------|-------------------------|-------------|
|                    |           | Mean               | Std. Error | 95% Confidence Interval |             |
|                    |           |                    |            | Lower Bound             | Upper Bound |
| sIL1RA             | Cluster 1 | -.087 <sup>a</sup> | .113       | -.310                   | .136        |
|                    | Cluster 2 | .150 <sup>a</sup>  | .148       | -.143                   | .443        |
| IL4                | Cluster 1 | -.168 <sup>a</sup> | .113       | -.392                   | .056        |
|                    | Cluster 2 | .290 <sup>a</sup>  | .149       | -.005                   | .585        |
| IL6                | Cluster 1 | -.143 <sup>a</sup> | .110       | -.360                   | .075        |
|                    | Cluster 2 | .247 <sup>a</sup>  | .144       | -.039                   | .532        |
| IL8                | Cluster 1 | -.150 <sup>a</sup> | .113       | -.374                   | .074        |
|                    | Cluster 2 | .259 <sup>a</sup>  | .149       | -.035                   | .554        |
| IL9                | Cluster 1 | -.055 <sup>a</sup> | .113       | -.279                   | .169        |
|                    | Cluster 2 | .095 <sup>a</sup>  | .149       | -.199                   | .390        |
| IL12               | Cluster 1 | -.182 <sup>a</sup> | .109       | -.398                   | .034        |
|                    | Cluster 2 | .314 <sup>a</sup>  | .143       | .030                    | .598        |
| IL13               | Cluster 1 | -.112 <sup>a</sup> | .115       | -.339                   | .115        |
|                    | Cluster 2 | .194 <sup>a</sup>  | .151       | -.105                   | .492        |
| IL15               | Cluster 1 | -.150 <sup>a</sup> | .110       | -.368                   | .067        |
|                    | Cluster 2 | .260 <sup>a</sup>  | .144       | -.026                   | .546        |
| IL17               | Cluster 1 | -.141 <sup>a</sup> | .114       | -.366                   | .084        |
|                    | Cluster 2 | .244 <sup>a</sup>  | .150       | -.053                   | .540        |
| TNFa               | Cluster 1 | -.094 <sup>a</sup> | .115       | -.321                   | .134        |
|                    | Cluster 2 | .162 <sup>a</sup>  | .151       | -.137                   | .461        |



|        |           |                    |      |       |      |
|--------|-----------|--------------------|------|-------|------|
| G_CSF  | Cluster 1 | -.109 <sup>a</sup> | .111 | -.328 | .110 |
|        | Cluster 2 | .188 <sup>a</sup>  | .145 | -.100 | .476 |
| GM_CSF | Cluster 1 | -.163 <sup>a</sup> | .110 | -.382 | .055 |
|        | Cluster 2 | .282 <sup>a</sup>  | .145 | -.006 | .570 |
| MIP1A  | Cluster 1 | -.092 <sup>a</sup> | .113 | -.316 | .132 |
|        | Cluster 2 | .159 <sup>a</sup>  | .149 | -.135 | .454 |
| MIP1b  | Cluster 1 | -.124 <sup>a</sup> | .110 | -.341 | .094 |
|        | Cluster 2 | .213 <sup>a</sup>  | .145 | -.073 | .500 |
| MCP1)  | Cluster 1 | -.092 <sup>a</sup> | .112 | -.314 | .130 |
|        | Cluster 2 | .159 <sup>a</sup>  | .147 | -.133 | .451 |
| CXCL10 | Cluster 1 | -.089 <sup>a</sup> | .112 | -.310 | .132 |
|        | Cluster 2 | .154 <sup>a</sup>  | .147 | -.137 | .445 |
| CCL11  | Cluster 1 | -.085 <sup>a</sup> | .115 | -.313 | .144 |
|        | Cluster 2 | .146 <sup>a</sup>  | .151 | -.154 | .446 |
| FGF    | Cluster 1 | -.091 <sup>a</sup> | .114 | -.317 | .135 |
|        | Cluster 2 | .157 <sup>a</sup>  | .150 | -.140 | .454 |
| PDGF   | Cluster 1 | -.062 <sup>a</sup> | .110 | -.280 | .156 |
|        | Cluster 2 | .107 <sup>a</sup>  | .145 | -.179 | .394 |

a. Covariates appearing in the model are evaluated at the following values: Age = 27.21, BMI = 23.320.

### Univariate Tests

| Dependent Variable |          | Sum of Squares | df  | Mean Square | F     | Sig. |
|--------------------|----------|----------------|-----|-------------|-------|------|
| sIL1RA             | Contrast | 1.562          | 1   | 1.562       | 1.625 | .205 |
|                    | Error    | 111.561        | 116 | .962        |       |      |

|        |          |         |     |       |       |      |
|--------|----------|---------|-----|-------|-------|------|
| IL4    | Contrast | 5.831   | 1   | 5.831 | 5.980 | .016 |
|        | Error    | 113.099 | 116 | .975  |       |      |
| IL6    | Contrast | 4.209   | 1   | 4.209 | 4.606 | .034 |
|        | Error    | 105.988 | 116 | .914  |       |      |
| IL8    | Contrast | 4.656   | 1   | 4.656 | 4.798 | .030 |
|        | Error    | 112.585 | 116 | .971  |       |      |
| IL9    | Contrast | .631    | 1   | .631  | .649  | .422 |
|        | Error    | 112.635 | 116 | .971  |       |      |
| IL12   | Contrast | 6.834   | 1   | 6.834 | 7.581 | .007 |
|        | Error    | 104.575 | 116 | .902  |       |      |
| IL13   | Contrast | 2.594   | 1   | 2.594 | 2.598 | .110 |
|        | Error    | 115.847 | 116 | .999  |       |      |
| IL15   | Contrast | 4.678   | 1   | 4.678 | 5.121 | .025 |
|        | Error    | 105.968 | 116 | .914  |       |      |
| IL17   | Contrast | 4.112   | 1   | 4.112 | 4.184 | .043 |
|        | Error    | 114.004 | 116 | .983  |       |      |
| TNFa   | Contrast | 1.820   | 1   | 1.820 | 1.818 | .180 |
|        | Error    | 116.114 | 116 | 1.001 |       |      |
| G_CSF  | Contrast | 2.439   | 1   | 2.439 | 2.626 | .108 |
|        | Error    | 107.722 | 116 | .929  |       |      |
| GM_CSF | Contrast | 5.509   | 1   | 5.509 | 5.949 | .016 |
|        | Error    | 107.429 | 116 | .926  |       |      |
| MIP1A  | Contrast | 1.755   | 1   | 1.755 | 1.810 | .181 |
|        | Error    | 112.498 | 116 | .970  |       |      |
| MIP1b  | Contrast | 3.156   | 1   | 3.156 | 3.440 | .066 |
|        | Error    | 106.438 | 116 | .918  |       |      |

|        |          |         |     |       |       |      |
|--------|----------|---------|-----|-------|-------|------|
| MCP1)  | Contrast | 1.750   | 1   | 1.750 | 1.833 | .178 |
|        | Error    | 110.754 | 116 | .955  |       |      |
| CXCL10 | Contrast | 1.641   | 1   | 1.641 | 1.736 | .190 |
|        | Error    | 109.671 | 116 | .945  |       |      |
| CCL11  | Contrast | 1.476   | 1   | 1.476 | 1.466 | .228 |
|        | Error    | 116.742 | 116 | 1.006 |       |      |
| FGF    | Contrast | 1.708   | 1   | 1.708 | 1.734 | .190 |
|        | Error    | 114.252 | 116 | .985  |       |      |
| PDGF   | Contrast | .796    | 1   | .796  | .866  | .354 |
|        | Error    | 106.582 | 116 | .919  |       |      |

The F tests the effect of Clusters. This test is based on the linearly independent pairwise comparisons among the estimated marginal means.

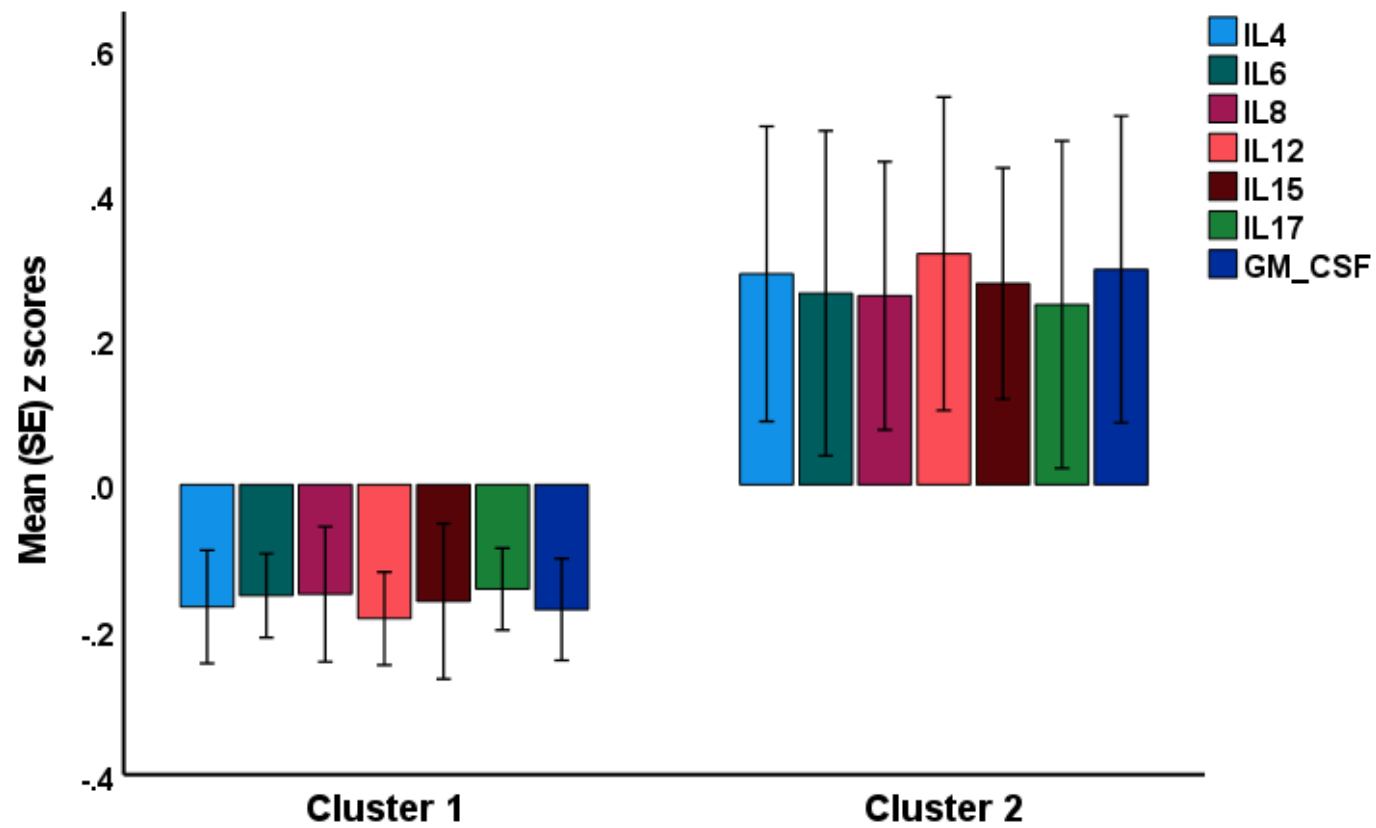

**ESF, Figure 1.** Results of cluster analysis performed on the Edinburgh Postnatal Depression Scale scores and immune profiles. IL: interleukin; GM-CSF: granulocyte-macrophage colony stimulating factor

**ESF, Table 5.** Results of general estimation equations (repeated measurements) analyses with the early and late Edinburgh Postnatal Depression Scale (EPDS) scores and immune profiles as dependent variables and time (early-late pregnancy phase), the cluster analysis-generated classes, and their interaction as explanatory variables.

| Variables              | Time, early    | Time, late     | Source       | Wald (df=1) | P      |
|------------------------|----------------|----------------|--------------|-------------|--------|
| EPDS Cluster 1         | 3.42 (0.29)    | 4.34 (0.36)    | Time         | 18.17       | <0.001 |
| EPDS Cluster 2         | 10.41 (0.67)   | 6.29 (0.69)    | Clusters     | 43.28       | <0.001 |
|                        |                |                | Interaction  | 44.93       | <0.001 |
| M1                     | -0.077 (0.901) | 0.205 (0.093)  | Time         | 6.48        | 0.011  |
| Th1 Cluster 1          | -0.295 (0.081) | 0.0237 (0.122) | Time         | 0.224       | 0.636  |
| Th1 Cluster 2          | 0.356 (0.198)  | 0.152 (0.164)  | Clusters     | 5.23        | 0.022  |
|                        |                |                | Interactions | 4.64        | 0.031  |
| Th-17 Cluster 1        | -0.310 (0.062) | 0.116 (0.108)  | Interaction  | 4.72        | 0.030  |
| Th-17 Cluster 2        | 0.255 (0.234)  | 0.155 (0.160)  |              |             |        |
| IRS Cluster 1          | -0.361 (0.069) | 0.136 (0.114)  | Clusters     | 4.04        | 0.044  |
| IRS Cluster 2          | 0.263 (0.208)  | 0.220 (0.181)  | Interaction  | 4.61        | 0.031  |
| CIRS                   | 0.216 (0.106)  | -0.200 (0.113) | Time         | 9.21        | 0.002  |
| GF Cluster 1           | -0.298 (0.093) | 0.252 (0.125)  | Interaction  | 5.80        | 0.016  |
| GF Cluster 2           | 0.139 (0.153)  | 0.041 (0.202)  |              |             |        |
| Tcell growth Cluster 1 | -0.291 (0.700) | 0.193 (0.125)  | Clusters     | 4.66        | 0.031  |
| Tcell growth Cluster 2 | 0.292 (0.184)  | 0.233 (0.206)  |              |             |        |
| IRS/CIRS               | -0.373 (0.093) | 0.534 (0.091)  | Time         | 69.90       | <0.001 |

Shown are the significant sources of variance. EPDS: Edinburgh Postnatal Depression Scale; M1: macrophage M1, Th: T helper, IRS: immune-inflammatory response system, CIRS: compensatory immunoregulatory system, GF: growth factors.
